# Supplementary material
Source: HighWire-hosted journal article supplement (https://ez-admanager.com/highwire/filestream/134480/field_highwire_adjunct_files/0/shima_114.pdf)
Supplement: shima_114.pdf [file shima_114.pdf]

# Anticuerpos anti-glicolípidos neutros en la encefalomiellorradiculoneuropatía

Sayuri Shima, MD  
Naoki Kawamura, MD  
Tomomasa Ishikawa, MD  
Hiromi Masuda, PhD  
Chihiro Iwahara, PhD  
Yoshiki Niimi, MD  
Akihiro Ueda, MD, PhD  
Kazuhisa Iwabuchi, PhD  
Tatsuro Mutoh, MD, PhD

Dirección para correspondencia al  
Dr. Mutoh:  
tmutoh@fujita-hu.ac.jp

## RESUMEN

**Objetivo:** El objetivo de este estudio fue revisar 4 pacientes con encefalomiellorradiculoneuropatía (EMRN) y evaluar los anticuerpos anti-glicolípidos neutros.

**Métodos:** Estudiamos la progresión de los hallazgos clínicos, radiológicos, neurofisiológicos y del LCR, así como también los anticuerpos anti-glicolípidos neutros en suero.

**Resultados:** Todos los pacientes desarrollaron debilidad motora aguda o subaguda y alteración de la conciencia. Su LCR mostró pleocitosis y concentraciones altas de inmunoglobulina G. La RM reveló lesiones en el cerebro y en la médula espinal. Los exámenes neurofisiológicos indicaron disfunción de la médula espinal, las raíces nerviosas y los nervios periféricos. La inmunoterapia con pulsos de esteroides y/o terapia de reemplazo con inmunoglobulina a altas dosis resultó en una clara y, con frecuencia, drástica mejoría clínica. La reactividad a los anticuerpos anti-glicolípidos neutros fue positiva en todos los pacientes con EMRN aguda, pero no en la fase de recuperación. Cuarenta y siete pacientes de la misma edad con otras enfermedades neurológicas y 28 voluntarios sanos, también de la misma edad, tuvieron anticuerpos anti-glicolípidos neutros negativos.

**Conclusión:** La resolución de las anomalías radiológicas y neurológicas y los títulos alterados de autoanticuerpos contra los glicolípidos neutros luego de la inmunoterapia sugiere que la EMRN está causada por un mecanismo inmunomediado. Estos autoanticuerpos podrían ser biomarcadores útiles para la EMRN. *Neurology*® 2014;82:114-118

## GLOSARIO

**EMRN** = encefalomiellorradiculoneuropatía; **GalCer** = galactosilceramida; **GSL** = glicosilglicolípidos; **LacCer** = lactosilceramida; **SNP** = sistema nervioso periférico.

La disfunción inmunológica celular o humoral es una causa de enfermedades desmielinizantes del SNC y el sistema nervioso periférico (SNP). Hay evidencia de que el suero de pacientes con enfermedades del SNC, como la esclerosis múltiple<sup>1</sup> y la encefalomiellitis aguda diseminada,<sup>2</sup> o enfermedades del SNP tienen reactividad *in vivo* e *in vitro* contra varios componentes del SNC y SNP.<sup>1</sup>

La literatura contiene descripciones de pacientes con encefalomiellorradiculoneuropatía (EMRN).<sup>3,4</sup> Algunos autores han retratado a la EMRN como una encefalomiellitis aguda diseminada con un síndrome de Guillain-Barré o una desmielinización inflamatoria central y periférica combinada.<sup>5,6</sup>

Hemos reportado previamente anticuerpos contra glicosilceramida en el suero de pacientes con policondritis recidivante con encefalitis límbica.<sup>7</sup> Aquí, se describen 4 pacientes con EMRN cuyo suero fue positivo para anticuerpos anti glicosilglicolípidos (GSL) neutros.

**MÉTODOS** **Paciente 1.** Una mujer de 50 años de edad fue hospitalizada por meningitis viral luego de una enfermedad tipo gripal, y un mes después fue transferida a nuestro hospital por el empeoramiento de su sintomatología. Su examen reveló un nivel de conciencia disminuido, tetraplejía e hiperreflexia sin reflejos patológicos, síndrome de Horner izquierdo, hiperestesia facial e incontinencia urinaria (tabla). Los autoanticuerpos en suero, el test anti-acuaporina 4, títulos de anticuerpos antivirales y estudios por PCR fueron negativos. Los hallazgos del LCR eran anormales (tabla). La RM en secuencias FLAIR y T2 mostró lesiones hiperintensas (figura 1A) y el SPECT cerebral mostró un aumento del consumo en las mismas regiones (figura 1C). La RM cervical reveló una médula espinal edematosa y lesiones medulares largas hiperintensas (figura 1B). Los estudios de conducción nerviosa mostraron un decremento de la amplitud de los potenciales de acción motores compuestos y de los potenciales de acción sensitivos con ausencia de ondas F en múltiples nervios. Los potenciales evocados auditivos y somatosensitivos fueron anormales también.

Se administró terapia con pulsos de esteroides (1000 mg/d) por 3 días consecutivos seguidos de altas dosis de inmunoglobulina IV (0,4 g/kg/d) por 5 días. La condición clínica de la paciente y los hallazgos del LCR, la RM y el SPECT mejoraron (figura 1, D-F). Ella se recuperó completamente luego de 6 meses.

**Paciente 2.** Un hombre de 49 años fue hospitalizado por una disminución del estado de conciencia 1 semana luego del comienzo de síntomas gripales. El examen neurológico reveló una parálisis facial izquierda, disfunción autonómica y tetraplejía

Del Department of Neurology (S.S., N.K., T.I., Y.N., A.U., T.M.), Fujita Health University School of Medicine, Aichi; y el Institute for Environmental and Gender Specific Medicine (H.M., C.I., K.I.), Juntendo University Graduate School of Medicine, Chiba, Japan.

Ir a [Neurology.org](http://Neurology.org) para declaraciones de intereses completas. Aquellas relevantes para los autores se encuentran al final del artículo.

**Tabla** Características clínicas de 4 pacientes con EMRN

|                                                       | Paciente 1                       | Paciente 2                       | Paciente 3       | Paciente 4                     |
|-------------------------------------------------------|----------------------------------|----------------------------------|------------------|--------------------------------|
| Edad, a/sexo                                          | 50/F                             | 49/M                             | 26/M             | 76/F                           |
| Evento antecedente                                    | Meningitis viral                 | Gripe                            | Gripe            | -                              |
| Debilidad, escala MRC                                 | 2-3                              | 3-4                              | 2-3              | 4-5                            |
| Escala de GCS en la admisión                          | 11 (2-4-5)                       | 11 (2-4-5)                       | 11 (2-4-5)       | 14 (3-5-6)                     |
| Disfunción autonómica                                 | + (inconti., síndrome de Horner) | + (ileo, inconti., PA inestable) | + (inconti.)     | + (PA inestable, constipación) |
| Número de células en el LCR/mm <sup>3</sup>           | 109                              | 116                              | 70               | 43                             |
| Nivel proteico/IgG en el LCR, mg/dL                   | 81/10                            | 192/43                           | 173/19           | 65/12                          |
| PCR en tiempo real en el LCR (EBV, HSV, CMV, HHV6, 7) | -                                | -                                | -                | -                              |
| Estudio neurofisiológico                              | Principalmente A                 | A + D                            | Principalmente A | A + D                          |
| CMAP y SNAP ↓                                         | +                                | +                                | +                | +                              |
| VCN ↓                                                 | -                                | +                                | -                | +                              |
| Frecuencia de la onda F, %                            | 0                                | 0                                | 0                | 0                              |
| Anormalidad del PEAT, PESS                            | +                                | +                                | +                | +                              |
| Título de anticuerpos en suero LacCer/GalCer/GlcCer   | 2+/- <sup>a</sup>                | 3+/ <sup>a</sup>                 | 2+/ <sup>a</sup> | 2+/- <sup>a</sup>              |

Abreviaturas: A = axonal; CMAP = potencial de acción muscular compuesto; CMV = citomegalovirus; D = desmielinización; EBV = Epstein-Barr virus; EMRN = encefalomielorradiculoneuropatía; GalCer = anticuerpo anti galactosilceramida en suero; GCS = *Glasgow Coma Scale* (escala de coma de Glasgow); GlcCer = anticuerpo anti glucosilceramida en suero; HHV6 = herpes virus humano 6; HHV7 = herpes virus humano 7; HSV = herpes simplex virus; IgG = inmunoglobulina G; inconti. = incontinencia urinaria; LacCer = lactosilceramida; MRC = *Medical Research Council*; PA = presión arterial; PEAT = potencial evocado auditivo de tronco; PESS = potencial evocado somato sensitivo; SNAP = potencial de acción sensitivo; VCN = velocidad de conducción nerviosa.

↓ = reducción.

<sup>a</sup>Proporción de densidad óptica: > 3 3+; 2 < 2+ < 3; 1 < 1+ < 2; 0,3 < ± < 1; 0,3 < -.

con hiperreflexia generalizada (tabla). Los exámenes de laboratorio mostraron una reacción inflamatoria leve, sin autoanticuerpos. Las imágenes de secuencia T1 de RM con gadolinio mostraron hiperintensidad meníngea, y la RM cervical mostró una médula espinal edematosa. El SPECT mostró un

aumento del consumo en los lóbulos parietal y temporal derechos. Los hallazgos neurofisiológicos y el examen de LCR fueron anormales (tabla). Luego del tratamiento inmunomodulador, rápidamente el paciente recuperó su estado de conciencia y las anomalías radiológicas se resolvieron.

**Figura 1** Imágenes neurorradiológicas seriadas del paciente 1.

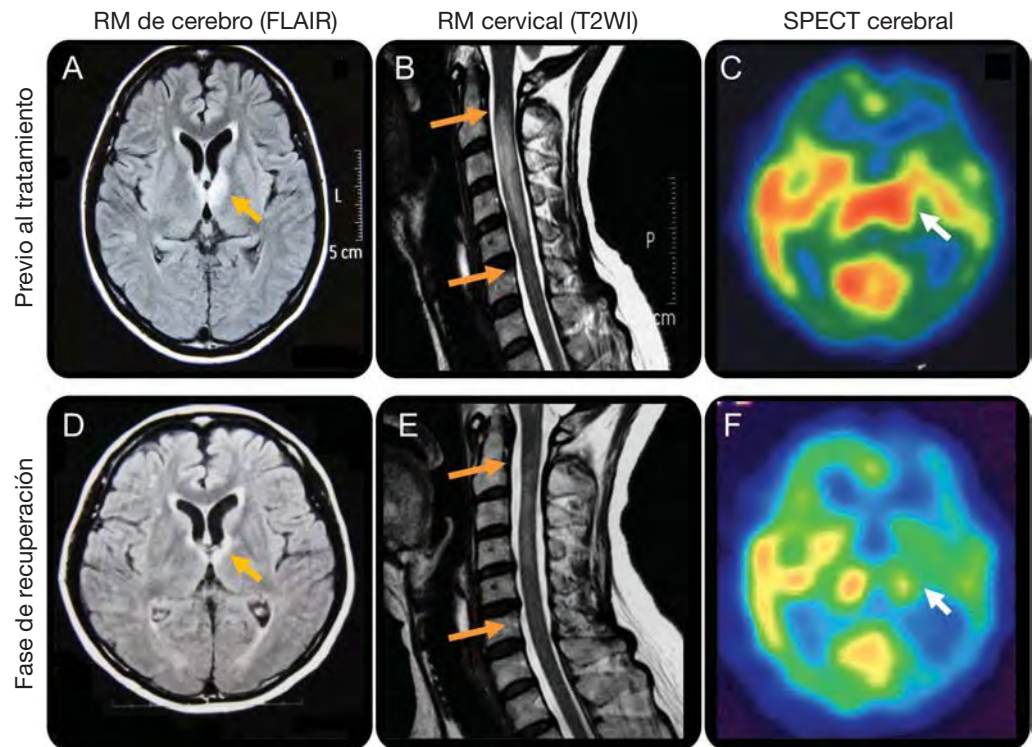

(A) RM de cerebro axial secuencia FLAIR. (B) RM cervical de la médula espinal secuencia T2 sagital. (C) SPECT cerebral obtenida en día 3. (D-F) Los mismos exámenes obtenidos en día 52. Las áreas hiperintensas en RM tanto en el cerebro como en la médula espinal del día 3 se resolvieron en el día 52. Las flechas indican lesiones hiperintensas en RM que corresponden a áreas de alto consumo en SPECT cerebral.

**Figura 2 Representación de Far Eastern Blot de GSL neutros y preabsorción de muestras de suero con una mezcla de LacCer, GalCer y GlcCer seguidos de análisis de Far Eastern blot**

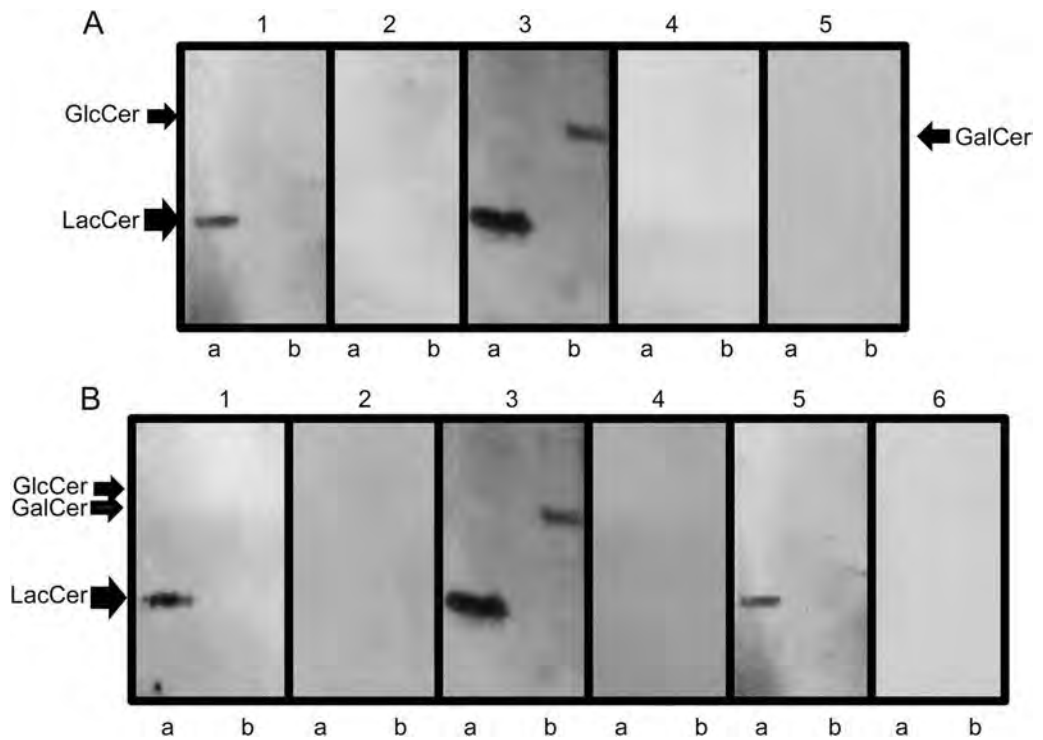

(A) GlcCer, GalCer y LacCer purificados y procesados por cromatografía de capa fina fueron corridos electrotérmicamente en una membrana de *polyvinylidene difluoride* (*Far-Eastern blotting*). La membrana fue probada con muestras de suero del paciente 1 obtenidas antes (1) y después (2) de recibir inmunoterapia combinada, muestras de suero del paciente 2 antes (3) y después (4) de recibir inmunoterapia combinada y suero de un voluntario sano (5). La posición de cada glicolípido neutro fue determinada en una placa de cromatografía de capa fina teñido con un reactivo de anisaldehído. Realizamos estos experimentos al menos 3 veces utilizando diferentes muestras de suero, esencialmente con resultados idénticos. Se muestran pruebas representativas. Nótese que el suero obtenido antes de la inmunoterapia en el paciente 1 fue solo positivo para LacCer (fracción de inmunoglobulina G), mientras que el suero del paciente 2 fue positivo para LacCer y en menor medida GalCer (fracción de inmunoglobulina G). En contraste, las muestras de suero obtenidas de pacientes con EMRN luego del tratamiento y de 28 voluntarios sanos no mostraron reactividad contra estos GSL. Las flechas indican las posiciones de LacCer, GlcCer y GalCer. (B) Las muestras de suero de pacientes con EMRN fueron preabsorbidas con 0,1  $\mu\text{g}$  de los 3 GSL neutros cada una (LacCer, GalCer y GlcCer) a 37°C por 30 minutos. Estas muestras preabsorbidas fueron utilizadas para análisis adicionales. El suero del paciente 4 antes (1) y después (2) de la preabsorción con GSL neutros, del paciente 2 antes (3) y después (4) de la preabsorción, y del paciente 1 antes (5) y después (6) de la preabsorción fue utilizado para análisis adicionales. El suero preabsorbido con GSL neutros no fue reactivo contra estos antígenos, lo que sugiere que los anticuerpos contra estos glicolípidos causaron una reactividad positiva inicial. Estos experimentos fueron realizados al menos 3 veces con resultados esencialmente idénticos. Se muestran pruebas representativas. Las flechas indican las posiciones de LacCer, GlcCer y GalCer. EMRN = encefalomielleradiculoneuropatía; GalCer = galactosilceramida; GlcCer = glucosilceramida; GSL = glicoesfingolípido; LacCer = lactosilceramida.

**Paciente 3.** Los hallazgos clínicos de este hombre de 26 años de edad se muestran en la tabla. Sus datos de laboratorio fueron normales excepto por un nivel anormal de hormona antidiurética. La RM cerebral mostró lesiones hiperintensas en el cuerpo caloso, y notamos un aumento del flujo sanguíneo cerebral en el SPECT.

En el cuarto día, el paciente se tornó profundamente comatoso y requirió ventilación mecánica. Luego del tratamiento inmunomodulador, su debilidad motora mejoró y su disfunción respiratoria se resolvió. Luego de 2 meses, todas las anomalías neurofisiológicas y radiológicas se resolvieron.

**Paciente 4.** Los detalles clínicos de esta mujer de 76 años de edad se muestran en la tabla. La paciente tenía parálisis del nervio motor ocular externo y disfunción autonómica. Los datos de laboratorio eran negativos, pero los hallazgos de los exámenes neurofisiológicos fueron anormales. No vimos lesiones en la RM cerebral.

Luego del tratamiento con inmunoglobulina, la disfunción del par craneal se resolvió y sus funciones sensitivas y motoras mejoraron gradualmente durante el siguiente mes.

**Suero de pacientes y voluntarios sanos.** Se obtuvo suero de sangre fresca coagulada y se conservó inmediatamente en alícuotas a -80°C hasta el ensayo. Para comparar, se obtuvieron muestras de suero de 47 pacientes de igual sexo y edad con otras enfermedades neurológicas (8 con atrofia de múltiples sistemas, 4 con neuromielitis óptica, 20 con poliradiculoneuropatía desmielinizante crónica inflamatoria y 15 con esclerosis múltiple) y de 28 voluntarios sanos emparejados por edad.

**Aprobaciones de protocolos estándar, registros y consentimiento informado de pacientes.** Todos los participantes del estudio dieron su consentimiento informado por escrito para ser incluidos en este estudio. Los comités de bioética de *Fujita Health University* y *Juntendo University* aprobaron el estudio.

**Análisis de Far Eastern blot utilizando suero humano.** Los análisis de *Far Eastern blot* fueron realizados utilizando ambos GSL ácidos y neutros (Matreya, Pleasant Gap, PA) como ha sido descrito previamente.<sup>8,9</sup> La membrana de *polyvinylidene difluoride* fue tratada con suero humano (a una dilución de  $\times 500$  a  $\times 2000$ ) en solución amortiguadora de bloqueo

(leche descremada 2% en salina amortiguada con fosfato que contiene Triton X-100 1%). Luego del tratamiento con un segundo anticuerpo, se detectaron bandas positivas utilizando quimioluminiscencia realizada (PerkinElmer Inc., Boston, MA). Para identificar la identidad del antígeno, incubamos cada suero con una mezcla de 0,1 µg de GSL por 30 minutos a 37°C y estos sueros preabsorbidos fueron utilizados para el análisis por Far Eastern blot.<sup>10</sup> Para la cuantificación, sometimos todas las membranas a análisis por imágenes utilizando el *software* del NIH, calculando la proporción de intensidad de señal contra la intensidad de fondo como ha sido descrito previamente.<sup>10</sup>

**Análisis por resonancia plasmónica de superficie.** Véase apéndice e-1 en el sitio web de *Neurology*<sup>®</sup> [www.neurology.org](http://www.neurology.org).

**RESULTADOS Resumen clínico.** La tabla muestra los detalles clínicos de los 4 pacientes con EMRN. Todos tuvieron debilidad motora aguda o subaguda, disminución del estado de conciencia aguda o subaguda, disfunción del tronco del encéfalo y pleocitosis leve del LCR, así como también títulos de anticuerpos antivirales negativos (incluso HIV) y ensayos por PCR en tiempo real para genoma viral en LCR.

**Detección de anticuerpos anti GSL neutros.** En todos los pacientes con EMRN, muestras de suero agudas mostraron bandas positivas claras correspondientes a lactosilceramida (LacCer) (figura 2A, banda 1). En 2 pacientes, notamos una banda débil correspondiente a galactosilceramida (GalCer) (figura 2A, banda 3). En contraste, las muestras de suero de la fase de recuperación no mostraron reactividad contra los GSL neutros (figura 2A, bandas 2 y 4). Ni los pacientes con otras enfermedades neurológicas ni los 28 controles sanos tuvieron reactividad contra los GSL neutros (datos no mostrados). Los títulos de anticuerpos anti GSL neutros se muestran en la tabla.

Las muestras de suero que fueron preabsorbidas con una mezcla de GSL neutros no mostraron bandas positivas, esto sugiere que la reactividad positiva inicial fue causada por anticuerpos contra estos GSL (figura 2B, bandas 2, 4 y 6). El LCR de la fase aguda de pacientes con EMRN fue débilmente positivo para GalCer y ninguno de los sueros fue positivo contra gangliósidos (datos no mostrados).

**Análisis por resonancia plasmónica de superficie.** La examinación de muestras de suero por resonancia plasmónica de superficie de pacientes con EMRN mostró anticuerpos contra LacCer (figura e-1, paciente 1) y en menor medida GalCer (figura e-1, pacientes 2 y 3). Las muestras de suero de controles no mostraron ninguna reactividad (figura e-2).

**DISCUSIÓN** Los síntomas predominantes que observamos en los 4 pacientes con EMRN fueron debilidad motora aguda y un nivel de conciencia disminuido. Los exámenes radiológicos mostraron anomalías del cerebro y la médula espinal, y los estudios electrofisiológicos indicaron disfunción de la médula espinal, raíces nerviosas y nervios periféricos. Muy pocos casos con EMRN han sido reportados y la mayoría tuvieron buena respuesta a la inmunoterapia, de manera similar a los casos descritos aquí.<sup>3,4</sup>

GalCer es un GSL principal en las membranas celulares de las células formadoras de mielina, tales

como los oligodendrocitos y las células de Schwann. El anticuerpo anti GalCer causa una enfermedad desmielinizante del SNP en los conejos.<sup>e1</sup> LacCer se distribuye en todo el cuerpo, incluso el SNC, SNP y las células sanguíneas como los neutrófilos.<sup>e2-e5</sup> En los neutrófilos humanos, la unión del anticuerpo anti LacCer al dominio LacCer causa producción de superóxido dismutasa y fagocitosis.<sup>e5</sup> A pesar de que este reporte involucra un número pequeño de pacientes, nuestros resultados indican fuertemente que los anticuerpos anti GSL pueden ser utilizados como biomarcadores de EMRN.

## CONTRIBUCIONES DE LOS AUTORES

El Dr. Shima realizó la adquisición de datos, análisis y preparación del manuscrito. Los Dres. Kawamura, Ishikawa, Niimi y Ueda realizaron la evaluación de los pacientes, la adquisición de los datos y el análisis. Los Dres. Masuda, Iwahara e Iwabuchi analizaron e interpretaron los datos de análisis de resonancia plasmónica de superficie. El Dr. Mutoh estuvo involucrado en el diseño del estudio, la supervisión científica y la preparación y revisión del manuscrito.

## FINANCIAMIENTO DEL ESTUDIO

El estudio fue parcialmente financiado por una beca del MEXT-Supported Program for the Strategic Research Foundation at Private Universities and Scientific Research (C) from the Ministry of Education, Culture, Sports, Science and Technology of Japan, y una beca de investigación para enfermedades intratables del Ministry of Health, Labor and Welfare of Japan to T.M.

## DECLARACIÓN DE INTERESES

Los autores no tienen nada que declarar en relación con este manuscrito. Ir a [Neurology.org](http://Neurology.org) para declaraciones completas.

*Recibido el 15 de mayo de 2013. Aceptado en su forma final el 26 de septiembre de 2013.*

## BIBLIOGRAFÍA

1. Lisak RP, Zweiman B, Burns JB, et al. Immune responses to myelin antigens in multiple sclerosis. *Ann NY Acad Sci* 1984;436:221–230.
2. Kesselring J, Miller DH, Robb SA, et al. Acute disseminated encephalomyelitis: MRI findings and the distinction from multiple sclerosis. *Brain* 1990;113:291–302.
3. Blennow G, Gamstrop I, Rosenberg R. Encephalo-myeloladiculo-neuropathy. *Dev Med Child Neurol* 1968;10:485–490.
4. Itokazu N, Kodama Y, Kontani S, et al. A case of acute polyradiculoneuritis with multiple cranial nerve palsy and cerebral lesion: possible evidence of encephalo-myeloladiculo-neuropathy. *Brain Dev* 1998;30:423–429.
5. Kinoshita K, Hayashi M, Miyamoto K, Oda M, Tanabe H. Inflammatory demyelinating polyradiculitis in a patient with acute disseminated encephalomyelitis (ADEM). *J Neurol Neurosurg Psychiatry* 1996;60:87–90.
6. Rubin M, Karpati G, Carpenter S. Combined central and peripheral myelinopathy. *Neurology* 1987;37:1287–1290.
7. Mihara T, Mutoh T, Yoshikawa T, et al. Postinfectious myeloladiculo-neuropathy with cranial nerve involvements associated with human herpesvirus 7 infection. *Arch Neurol* 2005;62:1755–1757.
8. Mihara T, Ueda A, Hirayama M, et al. Detection of new anti-neutral glycosphingolipids antibodies and their effects on Trk neurotrophin receptors. *FEBS Lett* 2006;580:4991–4995.
9. Mutoh T, Kawamura N, Hirabayashi Y, et al. Abnormal cross-talk between mutant presenilin 1 (I143T, G384A) and glycosphingolipid biosynthesis. *FASEB J* 2012;26:3065–3074.
10. Ueda A, Shima S, Miyashita T, et al. Anti-GM1 antibodies affect the integrity of lipid rafts. *Mol Cell Neurosci* 2010; 45:355–362.
